# Supplementary material for: Facile synthesis of well-controlled poly(glycidyl methacrylate) and its block copolymers via SARA ATRP at room temperature
Source: Royal Society of Chemistry journal article supplement (doi:10.1039/c4py01616e), 2014-12-23
Supplement: c4py01616e1.pdf [file c4py01616e1.pdf]

## ***Supporting Information***

### **Facile Synthesis of Well-controlled Poly(glycidyl methacrylate) and its Block Copolymers via SARA ATRP at Room Temperature**

**Francisco Catalão,<sup>a</sup> Joana R. Góis,<sup>a</sup> A. S. M. Trino,<sup>a</sup> Arménio C. Serra,<sup>a</sup> and Jorge F. J. Coelho<sup>a\*</sup>**

*<sup>a</sup> CEMUC, Department of Chemical Engineering, University of Coimbra, Polo II, Rua Sílvio Lima, 3030-790 Coimbra, Portugal. Fax: +351 239 798 703; Tel: +351 239 798 764; E-mail: [jcoelho@eq.uc.pt](mailto:jcoelho@eq.uc.pt)*

## Results

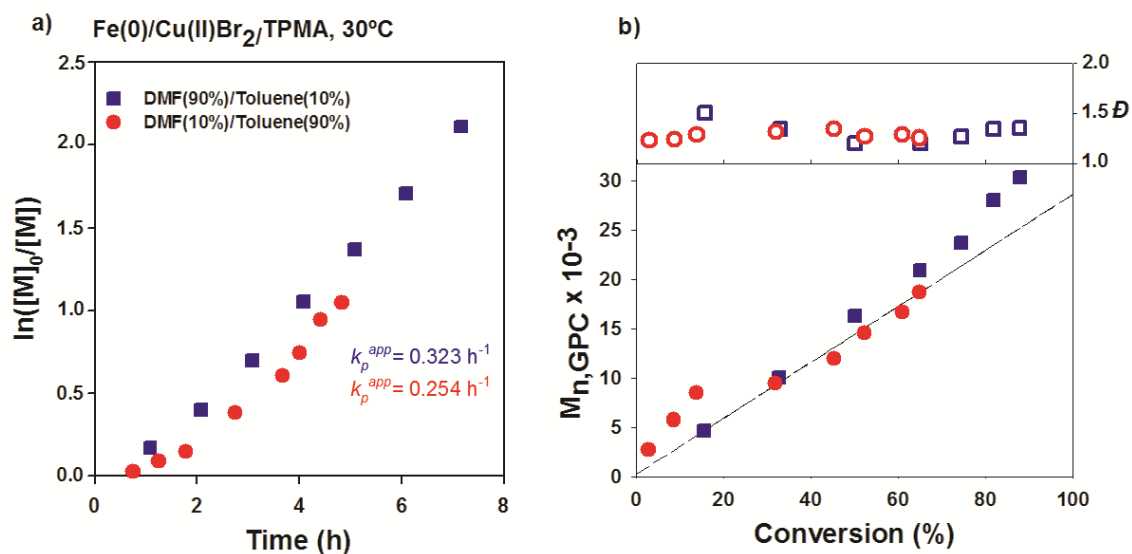

**Fig. S1** SARA ATRP of GMA in toluene/DMF = 10/90 (v/v) and toluene/DMF = 90/10 (v/v) at 30°C. (a) First-order kinetic plot, (b) evolution of MWs and  $M_w/M_n$  with conversion (the dashed line represents the theoretical MW at a given conversion). Reaction conditions:  $[GMA]_0/[EBiB]_0/[Fe(0)]_0/[CuBr_2]_0/[TPMA]_0 = 200/1/1/0.1/1.1$  (molar).

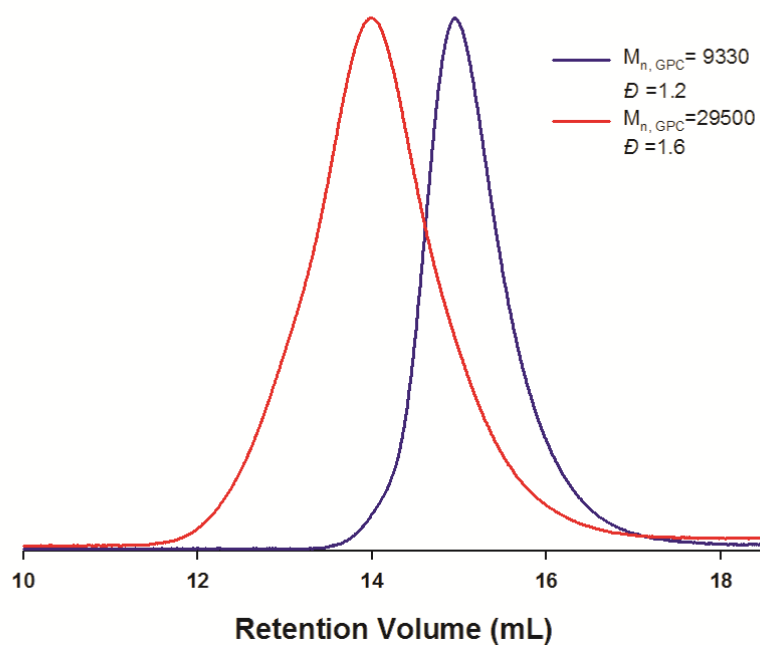

**Fig. S2** GPC traces of PGMA before (blue line) and after (red line) the chain extension experiment.

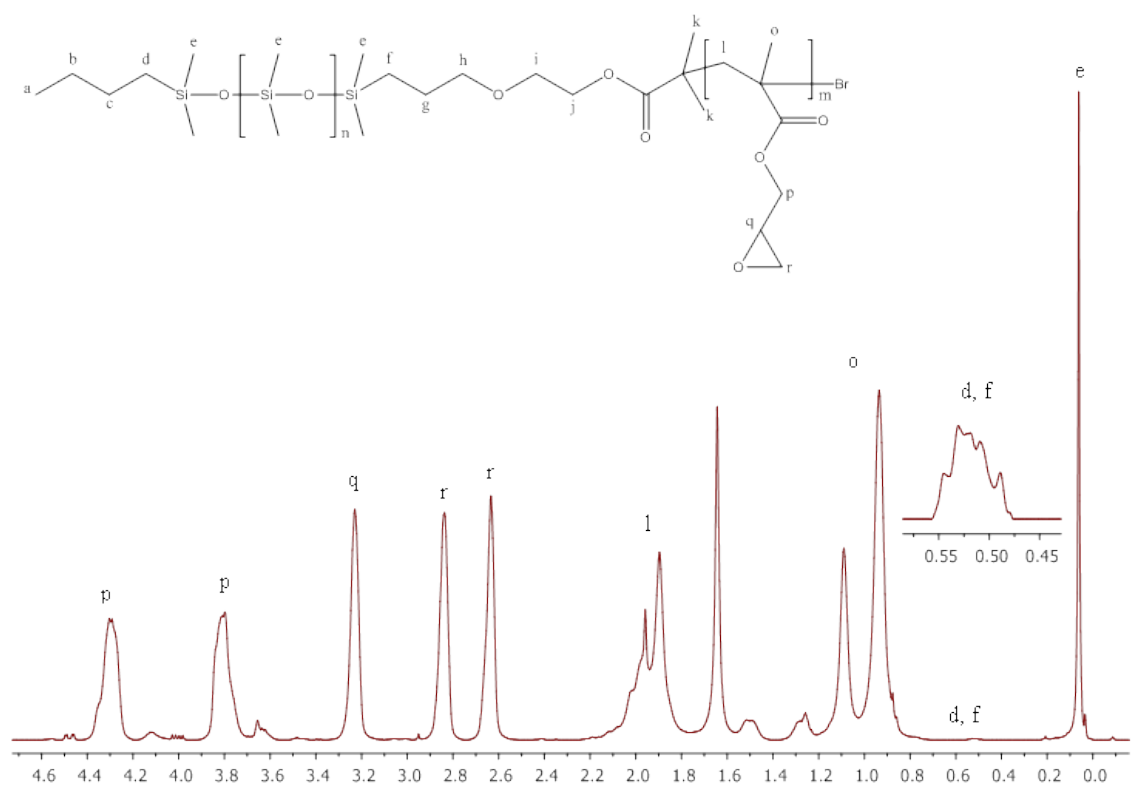

**Fig S3** <sup>1</sup>H-NMR spectrum of the PDMS-*b*-PGMA obtained ( $M_{n, \text{GPC}} = 33900 \text{ g mol}^{-1}$ ;  $\bar{D} = 1.5$ ;  $M_{n, \text{NMR}} = 27500 \text{ g mol}^{-1}$ ); in  $\text{CDCl}_3$ .
